# Supplementary material for: Alternative Solvents for the Biorefinery of Spirulina: Impact of Pretreatment on Free Fatty Acids with High Added Value
Source: MDPI journal article supplement (doi:10.3390/md20100600), 2022-09-25
Supplement: s1 [file s1]

# Alternative Solvents for the Biorefinery of Spirulina: Impact of Pretreatment on Free Fatty Acids with High Added Value

Laura Wils <sup>1</sup>, Mervé Yagmur <sup>1</sup>, Myriam Phelippe <sup>2</sup>, Bénédicte Montigny <sup>3</sup>, Barbara Clément-Larosière <sup>2</sup>, Johan Jacquemin <sup>4</sup> and Leslie Boudesocque-Delaye <sup>1,\*</sup>

<sup>1</sup> EA 7502 SIMBA, Université de Tours, Faculté de Pharmacie, 31 avenue Monge 37200 Tours, France

<sup>2</sup> Aqua Eco Culture, 7 rue d'Armor Maroué, 22400 Lamballe, France

<sup>3</sup> EA 6299 PCM2E, Université de Tours, Faculté des Sciences et Techniques, Bât J, Avenue Monge, 37200 Tours, France

<sup>4</sup> MSN Department Mohammed VI Polytechnic University, Lot 660, Hay Moulay Rachid, Ben Guerir 43150, Morocco

\* Correspondence: [leslie.boudesocque@univ-tours.fr](mailto:leslie.boudesocque@univ-tours.fr); +33(0)2.47.36.71.75

## Supplementary material

Table S1 Amount of FFA in biomasses in µg/g DM, *n.d.* not detected

| <i>Pretreatment</i>           | <i>C 12:0</i> | <i>C14:0</i> | <i>C 16:0</i> | <i>C18:0</i> | <i>C16:1</i> | <i>C18:1</i> | <i>C18:2</i> | <i>C18:3</i> |
|-------------------------------|---------------|--------------|---------------|--------------|--------------|--------------|--------------|--------------|
| <i>By-product<br/>SP-BP</i>   | <i>n.d.</i>   | <i>n.d.</i>  | 504.0 ± 7.8   | 171.0 ± 51.1 | 153.0 ± 7.8  | 72.0 ± 15.6  | 855.0 ± 68.0 | 796.5 ± 38.1 |
| <i>Frozen<br/>SP-F</i>        | <i>n.d.</i>   | <i>n.d.</i>  | 105.0 ± 7.5   | 100.0 ± 10.7 | 60.0 ± 0.0   | 37.5 ± 0.0   | 227.5 ± 15.6 | 517.5 ± 27.0 |
| <i>Oven-dried<br/>SP-OD</i>   | <i>n.d.</i>   | <i>n.d.</i>  | 322.8 ± 27.1  | 95.3 ± 7.5   | 62.8 ± 9.9   | 41.2 ± 7.5   | 476.7 ± 22.8 | 578.5 ± 39.3 |
| <i>Air-dried<br/>SP-AD</i>    | <i>n.d.</i>   | <i>n.d.</i>  | 33.3 ± 4.2    | 36.0 ± 3.5   | 16.0 ± 0.0   | 6.0 ± 2.8    | 26.7 ± 1.1   | 21.3 ± 1.2   |
| <i>Freeze-dried<br/>SP-FD</i> | <i>n.d.</i>   | <i>n.d.</i>  | 90.7 ± 13.0   | 127.5 ± 8.5  | <i>n.d.</i>  | 34.0 ± 0.0   | <i>n.d.</i>  | <i>n.d.</i>  |

Table S2 Average amount of FFA in extracts in mg/g DM

| <i>Pretreatment</i>           | <i>Solvent</i> | <i>C12:0</i> | <i>C14:0</i> | <i>C 16:0</i> | <i>C18:0</i> | <i>C16:1</i> | <i>C18:1</i> | <i>C18:2</i> | <i>C18:3</i> |
|-------------------------------|----------------|--------------|--------------|---------------|--------------|--------------|--------------|--------------|--------------|
| <i>By-product<br/>SP-BP</i>   | EtOAc          | <i>n.d</i>   | <i>n.d</i>   | 2.90          | 0.85         | 0.94         | 0.58         | 5.66         | 5.17         |
|                               | DMC            | <i>n.d</i>   | <i>n.d</i>   | 2.83          | 0.71         | 0.94         | 0.55         | 6.43         | 6.35         |
|                               | Heptane        | <i>n.d</i>   | <i>n.d</i>   | 0.45          | 0.40         | 0.261        | 0.21         | 0.50         | 1.67         |
|                               | C9/C10/C12     | <i>n.d</i>   | 32.46        | 35.5          | 32.44        | <i>n.d</i>   | 19.31        | 23.18        | 16.22        |
| <i>Frozen<br/>SP-F</i>        | EtOAc          | <i>n.d</i>   | <i>n.d</i>   | 0.56          | 0.51         | 0.28         | 0.34         | 2.63         | 0.18         |
|                               | DMC            | <i>n.d</i>   | <i>n.d</i>   | 0.16          | 0.11         | 0.07         | 0.09         | 0.97         | 0.47         |
|                               | Heptane        | 0.18         | <i>n.d</i>   | 0.16          | 0.18         | <i>n.d</i>   | 0.08         | 0.15         | 0.11         |
|                               | C9/C10/C12     |              | 4.16         | 4.65          | 4.95         | <i>n.d</i>   | 2.18         | <i>n.d</i>   | <i>n.d</i>   |
| <i>Oven-dried<br/>SP-OD</i>   | EtOAc          | 1.20         | <i>n.d</i>   | 1.66          | 0.16         | 0.28         | 0.20         | 2.26         | 2.97         |
|                               | DMC            | <i>n.d</i>   | <i>n.d</i>   | 0.85          | 0.09         | 0.16         | 0.10         | 1.21         | 1.64         |
|                               | Heptane        | <i>n.d</i>   | <i>n.d</i>   | 0.48          | 0.40         | 0.26         | 0.21         | 0.50         | 1.67         |
|                               | C9/C10/C12     | <i>n.d</i>   | <i>n.d</i>   | 4.41          | 3.05         | 2.03         | 1.70         | 3.82         | 2.20         |
| <i>Air-dried<br/>SP-AD</i>    | EtOAc          | 0.05         | <i>n.d</i>   | 0.06          | 0.05         | 0.03         | 0.03         | 0.04         | 0.03         |
|                               | DMC            | 0.02         | <i>n.d</i>   | 0.02          | 0.01         | 0.01         | 0.01         | 0.01         | 0.01         |
|                               | Heptane        | <i>n.d</i>   | <i>n.d</i>   | 0.05          | 0.05         | <i>n.d</i>   | 0.03         | 0.04         | 0.03         |
|                               | C9/C10/C12     | <i>n.d</i>   | <i>n.d</i>   | 5.73          | 5.73         | <i>n.d</i>   | 3.78         | <i>n.d</i>   | <i>n.d</i>   |
| <i>Freeze-dried<br/>SP-FD</i> | EtOAc          | <i>n.d</i>   | <i>n.d</i>   | 0.18          | 0.17         | <i>n.d</i>   | <i>n.d</i>   | 0.10         | <i>n.d</i>   |
|                               | DMC            | 0.11         | <i>n.d</i>   | 0.09          | 0.11         | <i>n.d</i>   | 0.04         | 0.05         | 0.05         |
|                               | Heptane        | 0.10         | <i>n.d</i>   | 0.09          | 0.10         | <i>n.d</i>   | 0.04         | 0.06         | <i>n.d</i>   |
|                               | C9/C10/C12     | <i>n.d</i>   | 3.83         | 4.11          | 3.84         | <i>n.d</i>   | 1.92         | <i>n.d</i>   | <i>n.d</i>   |

Table S3: Retention time and m/z (ESI-) of free fatty acids

| Fatty acids                         |                          | m/z    | RT (min) |
|-------------------------------------|--------------------------|--------|----------|
| <b>C12:0</b>                        | lauric acid              | 199.3  | 4.31     |
| <b>C14:0</b>                        | myristic acid            | 227.4  | 6.40     |
| <b>C16:0</b>                        | palmitic acid            | 255.4  | 8.43     |
| <b>C16:1</b>                        | palmitoleic acid         | 253.4  | 6.81     |
| <b>C18:0</b>                        | stearic acid             | 283.5  | 10.27    |
| <b>C18:1. <math>\omega</math>-9</b> | oleic acid               | 281.4  | 8.74     |
| <b>C18:2. <math>\omega</math>-6</b> | linoleic acid            | 279.4  | 7.38     |
| <b>C18:3. <math>\omega</math>-6</b> | $\gamma$ -linolenic acid | 277.25 | 6.16     |
| <b>C24:1. <math>\omega</math>-9</b> | nervonic acid            | 365.6  | 13.16    |
